# Supplementary material
Source: PubMed Central journal article supplement (PMC6459112)

## Supplementary Online Content

Nicolosi P, Ledet E, Yang S, et al. Prevalence of germline variants in prostate cancer and implications for current genetic testing guidelines. Published online February 7, 2019. *JAMA Oncol*. doi:10.1001/jamaoncol.2018.6760

**eTable 1.** Demographic Information for 3607 Patients with a Personal History of Prostate Cancer Who Underwent Germline Genetic Testing Between 2013 and 2018

**eTable 2.** Distribution by Ethnicity of Pathogenic/Likely Pathogenic/Risk Allele Variants Detected in Men with Prostate Cancer

**eTable 3.** Pathogenic/Likely Pathogenic/Risk Allele (Positive Variants) and Variants of Unknown Significance Detected in This Study

**eTable 4.** Comparison of Frequency of Mutations among Tested Patients From This Data Set Compared With Those in the Pritchard et al<sup>5</sup> Metastatic Series.

**eFigure 1.** Age at Diagnosis Compared With Age at Testing in Men with a Personal History of Prostate Cancer.

**eFigure 2.** Distribution of Genes in Which Pathogenic, Likely Pathogenic, and Increased Risk Allele Variants Were Detected in This Study.

This supplementary material has been provided by the authors to give readers additional information about their work.

**eTable 1. Demographic Information for 3607 Patients with a Personal History of Prostate Cancer Who Underwent Germline Genetic Testing Between 2013 and 2018**

|                                           | Total Cohort<br>(n = 3607) | Patients with a<br>Positive Finding<br>(n = 620) | Patients with a<br>Positive Finding<br>(% of Total) |
|-------------------------------------------|----------------------------|--------------------------------------------------|-----------------------------------------------------|
| <b><u>Age at Testing (Years)</u></b>      |                            |                                                  |                                                     |
| <50                                       | 134                        | 20                                               | 13.4                                                |
| 50–59                                     | 629                        | 111                                              | 15.7                                                |
| 60–69                                     | 1308                       | 237                                              | 16.9                                                |
| 70–79                                     | 1214                       | 189                                              | 14.5                                                |
| 80–89                                     | 297                        | 58                                               | 18.2                                                |
| >90                                       | 24                         | 5                                                | 20.8                                                |
| <b><u>Ancestry/Ethnicity</u></b>          |                            |                                                  |                                                     |
| White/white                               | 2594                       | 462                                              | 17.8                                                |
| Ashkenazi Jewish                          | 234                        | 52                                               | 22.2                                                |
| Black/<br>African American                | 227                        | 23                                               | 10.1                                                |
| Hispanic                                  | 78                         | 5                                                | 6.4                                                 |
| Asian                                     | 73                         | 11                                               | 15.1                                                |
| Other                                     | 401                        | 67                                               | 16.7                                                |
| <b><u>Family History<br/>(Cancer)</u></b> |                            |                                                  |                                                     |
| Prostate                                  | 1547                       | 256                                              | 16.6                                                |
| Breast                                    | 1450                       | 262                                              | 18.1                                                |

|                                           | <b>Total Cohort<br/>(n = 3607)</b> | <b>Patients with a<br/>Positive Finding<br/>(n = 620)</b> | <b>Patients with a<br/>Positive Finding<br/>(% of Total)</b> |
|-------------------------------------------|------------------------------------|-----------------------------------------------------------|--------------------------------------------------------------|
| <b><u>Family History<br/>(Cancer)</u></b> |                                    |                                                           |                                                              |
| Ovarian                                   | 355                                | 81                                                        | 22.8                                                         |
| Colon                                     | 659                                | 107                                                       | 16.2                                                         |
| Pancreatic                                | 402                                | 78                                                        | 19.4                                                         |
| Other                                     | 548                                | 96                                                        | 17.5                                                         |
|                                           |                                    |                                                           |                                                              |
| <b><u>Gleason Score</u></b>               |                                    |                                                           |                                                              |
| 3                                         | 2                                  | 0                                                         | 0                                                            |
| 4                                         | 5                                  | 0                                                         | 0                                                            |
| 5                                         | 2                                  | 0                                                         | 0                                                            |
| 6                                         | 139                                | 21                                                        | 15.1                                                         |
| 7                                         | 691                                | 110                                                       | 15.9                                                         |
| 8                                         | 246                                | 44                                                        | 17.9                                                         |
| 9                                         | 393                                | 62                                                        | 15.8                                                         |
| 10                                        | 60                                 | 10                                                        | 16.7                                                         |
| Unknown                                   | 2069                               | 374                                                       | 18.0                                                         |

**eTable 2. Distribution by Ethnicity of Pathogenic/Likely Pathogenic/Risk Allele Variants Detected in Men with Prostate Cancer**

| Gene          | White<br>(n = 2594) | Ashkenazi<br>Jewish<br>(n = 234) | Black/African<br>American<br>(n = 227) | Hispanic<br>(n = 78) | Asian<br>(n = 73) | Other<br>(n = 401) | Total |
|---------------|---------------------|----------------------------------|----------------------------------------|----------------------|-------------------|--------------------|-------|
| <i>APC</i>    | 9                   | 16                               | 0                                      | 0                    | 0                 | 5                  | 30    |
| <i>ATM</i>    | 48                  | 7                                | 2                                      | 0                    | 2                 | 6                  | 65    |
| <i>BLM</i>    | 3                   | 2                                | 0                                      | 0                    | 0                 | 1                  | 6     |
| <i>BMPR1A</i> | 1                   | 0                                | 0                                      | 0                    | 0                 | 0                  | 1     |
| <i>BRCA1</i>  | 29                  | 7                                | 3                                      | 0                    | 2                 | 2                  | 43    |
| <i>BRCA2</i>  | 119                 | 13                               | 6                                      | 3                    | 3                 | 20                 | 164   |
| <i>BRIP1</i>  | 7                   | 0                                | 0                                      | 0                    | 0                 | 0                  | 7     |
| <i>CDH1</i>   | 3                   | 0                                | 0                                      | 0                    | 0                 | 0                  | 3     |
| <i>CDKN1B</i> | 1                   | 0                                | 0                                      | 0                    | 0                 | 0                  | 1     |
| <i>CDKN1C</i> | 1                   | 0                                | 0                                      | 0                    | 0                 | 0                  | 1     |
| <i>CDKN2A</i> | 3                   | 0                                | 0                                      | 0                    | 0                 | 0                  | 3     |
| <i>CFTR</i>   | 3                   | 1                                | 1                                      | 1                    | 0                 | 0                  | 6     |
| <i>CHEK2</i>  | 74                  | 8                                | 1                                      | 0                    | 0                 | 12                 | 95    |
| <i>EPCAM</i>  | 1                   | 0                                | 0                                      | 0                    | 0                 | 0                  | 1     |
| <i>F5</i>     | 0                   | 1                                | 0                                      | 0                    | 0                 | 0                  | 1     |
| <i>FANCA</i>  | 2                   | 0                                | 0                                      | 0                    | 0                 | 0                  | 2     |
| <i>FANCC</i>  | 1                   | 0                                | 0                                      | 0                    | 0                 | 0                  | 1     |
| <i>FANCL</i>  | 1                   | 0                                | 0                                      | 0                    | 0                 | 0                  | 1     |
| <i>HFE</i>    | 1                   | 0                                | 0                                      | 0                    | 0                 | 0                  | 1     |
| <i>HOXB13</i> | 24                  | 0                                | 3                                      | 0                    | 0                 | 3                  | 30    |
| <i>MITF</i>   | 7                   | 0                                | 0                                      | 0                    | 0                 | 0                  | 7     |
| <i>MLH1</i>   | 2                   | 0                                | 0                                      | 0                    | 0                 | 0                  | 2     |
| <i>MSH2</i>   | 19                  | 1                                | 0                                      | 0                    | 0                 | 3                  | 23    |
| <i>MSH6</i>   | 9                   | 3                                | 0                                      | 1                    | 1                 | 1                  | 15    |

| Gene           | White<br>(n = 2594) | Ashkenazi<br>Jewish<br>(n = 234) | Black/African<br>American<br>(n = 227) | Hispanic<br>(n = 78) | Asian<br>(n = 73) | Other<br>(n = 401) | Total |
|----------------|---------------------|----------------------------------|----------------------------------------|----------------------|-------------------|--------------------|-------|
| <i>MUTYH</i>   | 49                  | 1                                | 2                                      | 0                    | 0                 | 3                  | 55    |
| <i>MYH7</i>    | 0                   | 1                                | 0                                      | 0                    | 0                 | 0                  | 1     |
| <i>NBN</i>     | 10                  | 0                                | 0                                      | 0                    | 0                 | 0                  | 10    |
| <i>NF1</i>     | 1                   | 0                                | 0                                      | 0                    | 0                 | 1                  | 2     |
| <i>PALB2</i>   | 13                  | 0                                | 2                                      | 0                    | 1                 | 1                  | 17    |
| <i>PMS2</i>    | 10                  | 1                                | 1                                      | 0                    | 1                 | 5                  | 18    |
| <i>PTCH1</i>   | 1                   | 0                                | 0                                      | 0                    | 0                 | 0                  | 1     |
| <i>RAD50</i>   | 5                   | 0                                | 0                                      | 0                    | 0                 | 2                  | 7     |
| <i>RAD51C</i>  | 4                   | 0                                | 1                                      | 0                    | 0                 | 0                  | 5     |
| <i>RAD51D</i>  | 3                   | 1                                | 0                                      | 0                    | 0                 | 0                  | 4     |
| <i>RECQL4</i>  | 1                   | 0                                | 0                                      | 0                    | 0                 | 0                  | 1     |
| <i>RET</i>     | 0                   | 0                                | 0                                      | 0                    | 1                 | 0                  | 1     |
| <i>SDHA</i>    | 2                   | 0                                | 0                                      | 0                    | 0                 | 0                  | 2     |
| <i>SDHB</i>    | 3                   | 0                                | 0                                      | 0                    | 0                 | 0                  | 3     |
| <i>SMAD4</i>   | 0                   | 0                                | 1                                      | 0                    | 0                 | 0                  | 1     |
| <i>SPINK1</i>  | 0                   | 0                                | 0                                      | 0                    | 0                 | 1                  | 1     |
| <i>TINF2</i>   | 1                   | 0                                | 0                                      | 0                    | 0                 | 0                  | 1     |
| <i>TMEM127</i> | 2                   | 0                                | 0                                      | 0                    | 0                 | 0                  | 2     |
| <i>TP53</i>    | 19                  | 0                                | 0                                      | 0                    | 0                 | 3                  | 22    |
| <i>TSC2</i>    | 1                   | 0                                | 0                                      | 0                    | 0                 | 1                  | 2     |
| <i>VHL</i>     | 0                   | 0                                | 0                                      | 0                    | 0                 | 1                  | 1     |
| <i>WRN</i>     | 1                   | 0                                | 0                                      | 0                    | 0                 | 0                  | 1     |

**eTable 3. Pathogenic/Likely Pathogenic/Risk Allele (Positive Variants) and Variants of Unknown Significance Detected in This Study**

| <b>Gene</b>   | <b>Number of Requisitions</b> | <b>Number of Positive Variants Detected</b> | <b>Number of Variants of Uncertain Significance Detected</b> |
|---------------|-------------------------------|---------------------------------------------|--------------------------------------------------------------|
| <i>BRCA2</i>  | 3459                          | 164                                         | 75                                                           |
| <i>BRCA1</i>  | 3436                          | 43                                          | 38                                                           |
| <i>MSH2</i>   | 3350                          | 23                                          | 48                                                           |
| <i>MSH6</i>   | 3346                          | 15                                          | 75                                                           |
| <i>PMS2</i>   | 3345                          | 18                                          | 50                                                           |
| <i>MLH1</i>   | 3343                          | 2                                           | 25                                                           |
| <i>EPCAM</i>  | 3331                          | 1                                           | 5                                                            |
| <i>TP53</i>   | 3329                          | 22                                          | 30                                                           |
| <i>CHEK2</i>  | 3300                          | 95                                          | 71                                                           |
| <i>ATM</i>    | 3207                          | 65                                          | 160                                                          |
| <i>NBN</i>    | 3145                          | 10                                          | 41                                                           |
| <i>PALB2</i>  | 3014                          | 17                                          | 42                                                           |
| <i>RAD51D</i> | 2689                          | 4                                           | 12                                                           |
| <i>HOXB13</i> | 2667                          | 30                                          | 0                                                            |
| <i>PTEN</i>   | 2641                          | 0                                           | 4                                                            |
| <i>STK11</i>  | 2622                          | 0                                           | 9                                                            |
| <i>CDH1</i>   | 2504                          | 3                                           | 28                                                           |
| <i>BRIP1</i>  | 2461                          | 7                                           | 36                                                           |
| <i>RAD51C</i> | 2438                          | 5                                           | 21                                                           |
| <i>NF1</i>    | 2347                          | 2                                           | 35                                                           |
| <i>APC</i>    | 2345                          | 30                                          | 76                                                           |
| <i>BARD1</i>  | 2336                          | 0                                           | 29                                                           |
| <i>MUTYH</i>  | 2322                          | 55                                          | 27                                                           |
| <i>SMAD4</i>  | 2282                          | 1                                           | 4                                                            |

**eTable 4. Comparison of Frequency of Mutations among Tested Patients From This Data Set Compared with Those in the Pritchard et al<sup>5</sup> Metastatic Series.**

| Gene          | This Study (%) | Pritchard et al., 2016 (%) | Difference (%) | 95% CI              | P Value |
|---------------|----------------|----------------------------|----------------|---------------------|---------|
| <i>APC</i>    | 1.28           | NT                         |                |                     |         |
| <i>ATM</i>    | 2.03           | 1.59                       | 0.44           | (-0.8683 to 1.3292) | 0.4480  |
| <i>BRCA1</i>  | 1.25           | 0.87                       | 0.38           | (-0.6822 to 1.0169) | 0.3997  |
| <i>BRCA2</i>  | 4.74           | 5.35                       | 0.61           | (-1.0213 to 2.6557) | 0.4950  |
| <i>BRIP1</i>  | 0.28           | 0.18                       | 0.10           | (-0.7383 to 0.4345) | 0.6756  |
| <i>CDKN2</i>  | 0.13           | NT                         |                |                     |         |
| <i>CDH1</i>   | 0.12           | NT                         |                |                     |         |
| <i>CHEK2</i>  | 2.88           | 1.87                       | 1.01           | (-0.6140 to 2.0679) | 0.1847  |
| <i>HOXB13</i> | 1.12           | NT                         |                |                     |         |
| <i>MLH1</i>   | 0.06           | 0.00                       |                |                     |         |
| <i>MSH2</i>   | 0.69           | 0.14                       | 0.55           | (-0.1547 to 0.9113) | 0.0870  |
| <i>MSH6</i>   | 0.45           | 0.14                       | 0.31           | (-0.3794 to 0.6227) | 0.2378  |
| <i>MUTYH</i>  | 2.37           | NT                         |                |                     |         |
| <i>NBN</i>    | 0.32           | 0.29                       | 0.03           | (-0.7430 to 0.3698) | 0.8985  |
| <i>NF1</i>    | 0.09           | NT                         |                |                     |         |
| <i>PALB2</i>  | 0.56           | 0.43                       | 0.13           | (-0.7278 to 0.5705) | 0.6727  |
| <i>PMS2</i>   | 0.54           | 0.29                       | 0.25           | (-0.5345 to 0.6257) | 0.3947  |
| <i>RAD50</i>  | 0.32           | NT                         |                |                     |         |
| <i>RAD51C</i> | 0.21           | 0.14                       | 0.07           | (-0.6070 to 0.3694) | 0.7123  |
| <i>RAD51D</i> | 0.15           | 0.43                       | 0.28           | (-0.0880 to 1.1166) | 0.1487  |
| <i>TP53</i>   | 0.66           | NT                         |                |                     |         |

Abbreviations: CI, confidence interval; NT, not tested.

**eFigure 1. Age at Diagnosis Compared With Age at Testing in Men with a Personal History of Prostate Cancer.** A distinctive rightward shift was identified and indicated a lag between the initial diagnosis of prostate cancer and referral for germline genetic testing.

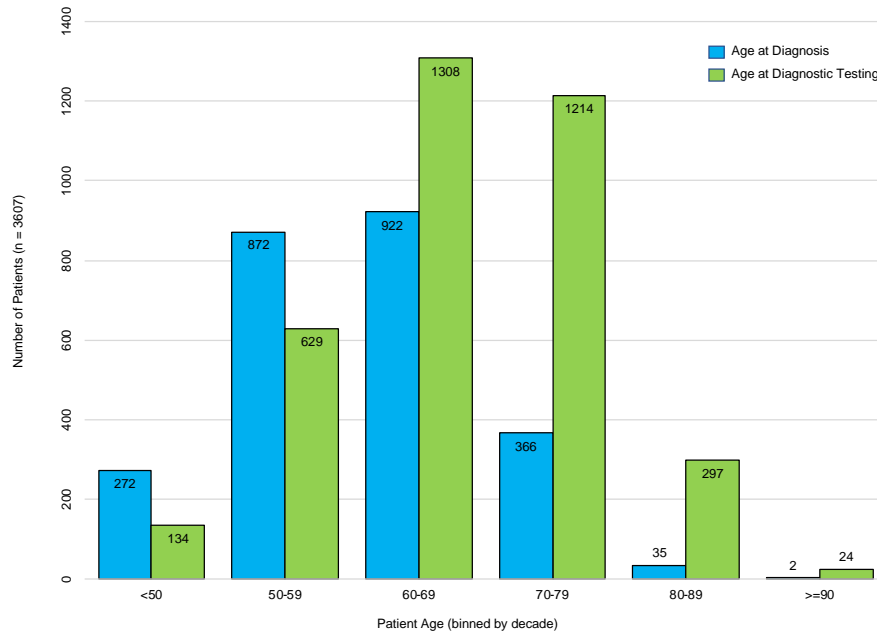



**eFigure 2. Distribution of Genes in Which Pathogenic, Likely Pathogenic, and Increased Risk Allele Variants Were Detected in This Study.** The number of positive findings detected in each gene is listed above the histogram. A small number of genes had several positive findings, whereas there was a long tail of genes in which only one positive finding was detected.

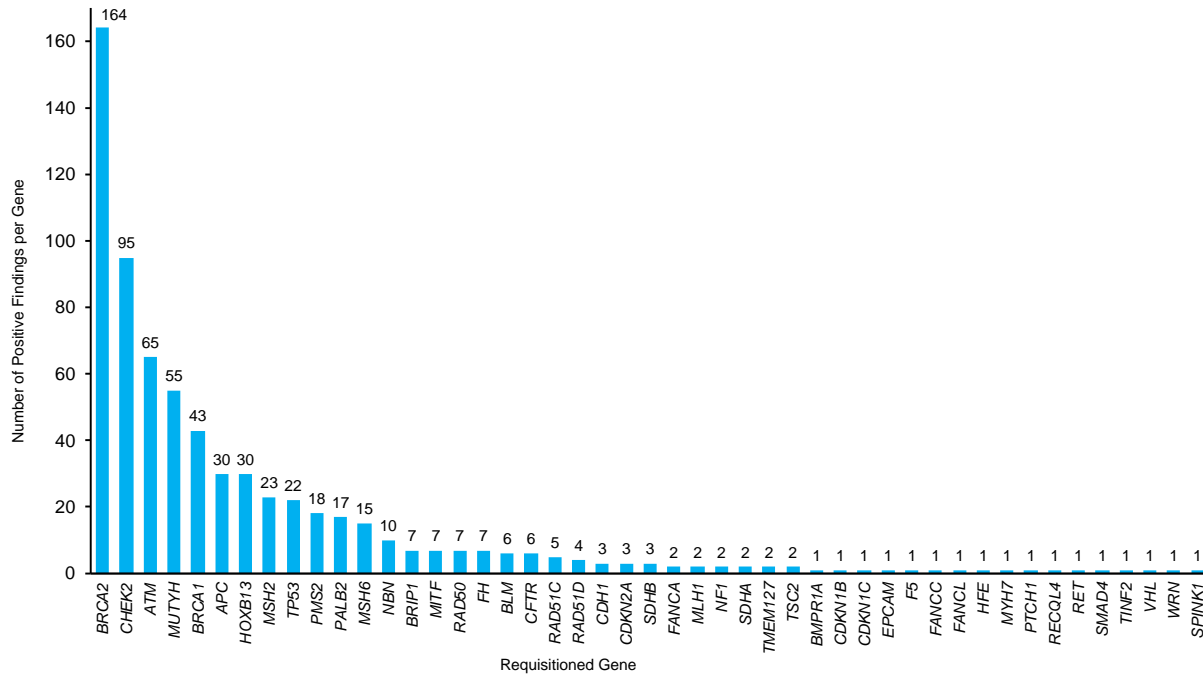

Supplement: jamaoncol-5-523-s001.pdf [file jamaoncol-5-523-s001.pdf]
